# Supplementary material
Source: PubMed Central journal article supplement (PMC11213267)
Supplement: bioinform_v4i1e42700_app1.pdf [file bioinform_v4i1e42700_app1.pdf]

Supplementary data: Fig. S1, Table S1.

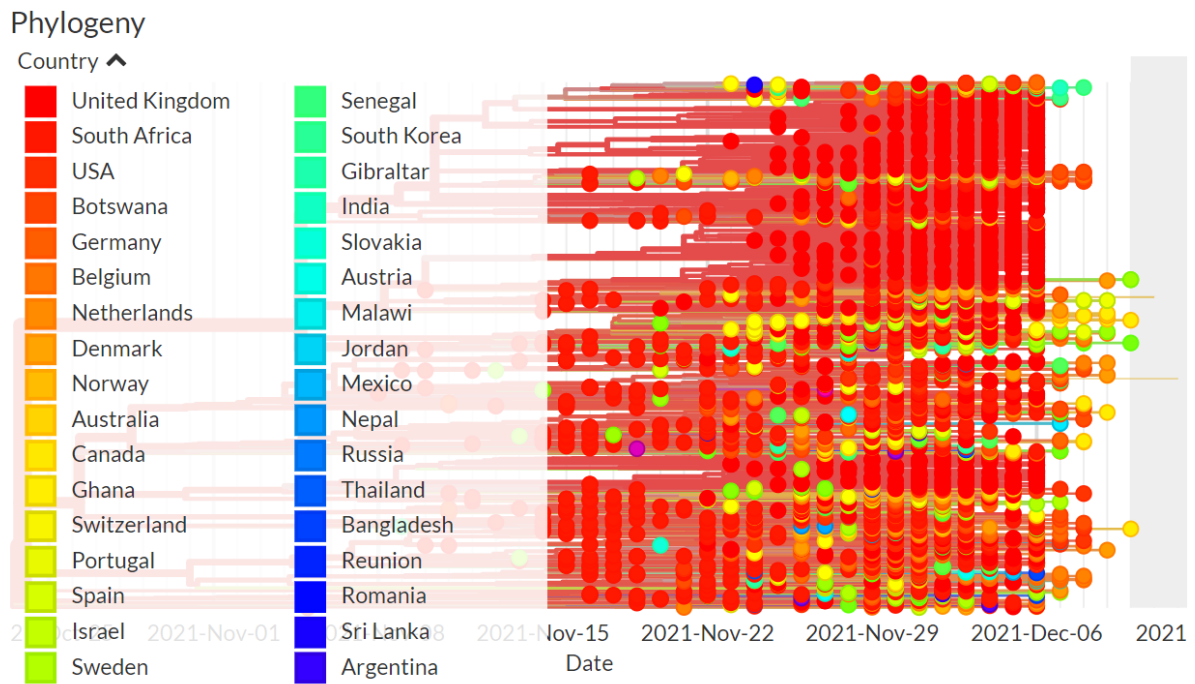

Figure S1 **Global spread of SARS-CoV-2 Omicron variant ( up to 10<sup>th</sup> Dec, 2021).** (Data source: The figure has been generated from the metadata provided with genomic sequences of Omicron using CoVsurver app from Gisaidd.org.)

**Table S1 Nucleotide and protein sequence homology of Omicron (BA.1)\* with wild-type SARS-CoV-2 and other global variants of concern/interest strains (WHO).**

**S1. 1 Nucleotide sequence alignment**

**S1.1.1 Complete nucleotide sequence**

| Ranking | SARS-CoV-2 strain            | Max score | Total score | Query cover | E value | Percentage Identity | Accession length | GISAID/NCBI Accession number |
|---------|------------------------------|-----------|-------------|-------------|---------|---------------------|------------------|------------------------------|
| 1.      | Alpha                        | 25401     | 53371       | 97%         | 0.0     | 99.75               | 29845            | EPI_ISL_6865096              |
| 2.      | Wild type (WT)               | 25351     | 53419       | 97%         | 0.0     | 99.67               | 29903            | NC_045512.2                  |
| 3.      | WT with D614G mutation (B.1) | 25346     | 53411       | 97%         | 0.0     | 99.66               | 29996            | EPI_ISL_6832722              |
| 4.      | Beta                         | 25298     | 53144       | 97%         | 0.0     | 99.62               | 29720            | EPI_ISL_6838995              |
| 5.      | Mu                           | 25292     | 53258       | 97%         | 0.0     | 99.59               | 29823            | EPI_ISL_6811664              |
| 6.      | Lambda                       | 25207     | 53221       | 97%         | 0.0     | 99.52               | 29856            | EPI_ISL_6694892              |
| 7.      | Gamma                        | 19038     | 51069       | 93%         | 0.0     | 99.89               | 29859            | EPI_ISL_6864534              |
| 8.      | Delta                        | 18979     | 52598       | 96%         | 0.0     | 99.78               | 29836            | EPI_ISL_6864866              |

**S1.1.2 Spike nucleotide sequence**

| Ranking | SARS-CoV-2 strain            | Max score | Total score | Query cover | E value | Percentage Identity | Accession length | GISAID/NCBI Accession number |
|---------|------------------------------|-----------|-------------|-------------|---------|---------------------|------------------|------------------------------|
| 1.      | Beta                         | 2876      | 6368        | 94%         | 0.0     | 99.62               | 29720            | EPI_ISL_6838995              |
| 2.      | WT with D614G mutation (B.1) | 2876      | 6442        | 94%         | 0.0     | 99.62               | 29996            | EPI_ISL_6832722              |
| 3.      | Wild type (WT)               | 2876      | 6437        | 94%         | 0.0     | 99.62               | 29903            | NC_045512.2                  |
| 4.      | Mu                           | 2870      | 6429        | 94%         | 0.0     | 99.56               | 29823            | EPI_ISL_6811664              |
| 5.      | Lambda                       | 2870      | 6274        | 94%         | 0.0     | 99.56               | 29856            | EPI_ISL_6694892              |
| 6.      | Alpha                        | 2865      | 6462        | 94%         | 0.0     | 99.49               | 29845            | EPI_ISL_6865096              |
| 7.      | Delta                        | 2865      | 6392        | 94%         | 0.0     | 99.49               | 29836            | EPI_ISL_6864866              |
| 8.      | Gamma                        | 2854      | 6398        | 94%         | 0.0     | 99.39               | 29859            | EPI_ISL_6864534              |

**S1.1.3 Receptor binding motif (RBM) nucleotide sequence**

| Ranking | SARS-CoV-2 strain            | Max score | Total score | Query cover | E value | Percentage Identity | Accession length | GISAID/NCBI Accession number |
|---------|------------------------------|-----------|-------------|-------------|---------|---------------------|------------------|------------------------------|
| 1.      | Alpha                        | 313       | 313         | 85%         | 3e-87   | 95.32               | 29845            | EPI_ISL_6865096              |
| 2.      | Delta                        | 313       | 313         | 85%         | 3e-87   | 95.32               | 29836            | EPI_ISL_6864866              |
| 3.      | Mu                           | 307       | 307         | 85%         | 1e-87   | 95.79               | 29823            | EPI_ISL_6811664              |
| 4.      | Gamma                        | 307       | 307         | 85%         | 1e-87   | 95.79               | 29859            | EPI_ISL_6864534              |
| 5.      | Beta                         | 307       | 307         | 85%         | 1e-87   | 95.79               | 29720            | EPI_ISL_6838995              |
| 6.      | WT with D614G mutation (B.1) | 307       | 307         | 85%         | 1e-87   | 95.79               | 29996            | EPI_ISL_6832722              |
| 7.      | Wild type (WT)               | 307       | 307         | 85%         | 1e-87   | 95.79               | 29903            | NC_045512.2                  |
| 8.      | Lambda                       | 302       | 302         | 85%         | 5e-87   | 95.26               | 29856            | EPI_ISL_6694892              |

## S1.2 Protein sequence alignment

### S1.2.1 Complete protein sequence

| Ranking | SARS-CoV-2 strain            | Max score | Total score | Query cover | E value | Percentage Identity | Accession length | GISAID/NCBI Accession number |
|---------|------------------------------|-----------|-------------|-------------|---------|---------------------|------------------|------------------------------|
| 1.      | Alpha                        | 56353     | 1.139e+05   | 100%        | 0.0     | 99.05               | 55890            | EPI_ISL_6865096              |
| 2.      | Beta                         | 25298     | 1.138e+05   | 99%         | 0.0     | 99.21               | 55693            | EPI_ISL_6838995              |
| 3.      | Wild type (WT)               | 25351     | 1.131e+05   | 100%        | 0.0     | 98.22               | 56040            | NC_045512.2                  |
| 4.      | Lambda                       | 25207     | 1.137e+05   | 100%        | 0.0     | 98.82               | 55954            | EPI_ISL_6694892              |
| 5.      | WT with D614G mutation (B.1) | 25346     | 1.141e+05   | 100%        | 0.0     | 99.47               | 56235            | EPI_ISL_6832722              |
| 6.      | Mu                           | 25292     | 1.139e+05   | 99%         | 0.0     | 99.40               | 55884            | EPI_ISL_6811664              |
| 7.      | Delta                        | 18979     | 1.126e+05   | 98%         | 0.0     | 99.68               | 55947            | EPI_ISL_6864866              |
| 8.      | Gamma                        | 19038     | 1.093e+05   | 96%         | 0.0     | 99.33               | 56110            | EPI_ISL_6864534              |

### S1.2.2 Spike protein sequence

| Ranking | SARS-CoV-2 strain            | Max score | Total score | Query cover | E value | Percentage Identity | Accession length | GISAID/NCBI Accession number |
|---------|------------------------------|-----------|-------------|-------------|---------|---------------------|------------------|------------------------------|
| 1.      | Delta                        | 2556      | 14331       | 100%        | 0.0     | 96.71               | 55947            | EPI_ISL_6864866              |
| 2.      | Alpha                        | 2536      | 14061       | 100%        | 0.0     | 97.01               | 55890            | EPI_ISL_6865096              |
| 3.      | Mu                           | 2534      | 14051       | 100%        | 0.0     | 97.02               | 55884            | EPI_ISL_6811664              |
| 4.      | WT with D614G mutation (B.1) | 2533      | 14031       | 100%        | 0.0     | 97.02               | 56235            | EPI_ISL_6832722              |
| 5.      | Wild type (WT)               | 2531      | 14021       | 100%        | 0.0     | 96.94               | 56040            | NC_045512.2                  |
| 6.      | Gamma                        | 2522      | 13949       | 100%        | 0.0     | 96.71               | 56110            | EPI_ISL_6864534              |
| 7.      | Beta                         | 2522      | 13934       | 100%        | 0.0     | 96.71               | 55693            | EPI_ISL_6838995              |
| 8.      | Lambda                       | 2496      | 13804       | 100%        | 0.0     | 96.00               | 55954            | EPI_ISL_6694892              |

### S1.2.3 Receptor binding motif (RBM) protein sequence

| Ranking | SARS-CoV-2 strain            | Max score | Total score | Query cover | E value | Percentage Identity | Accession length | GISAID/NCBI Accession number |
|---------|------------------------------|-----------|-------------|-------------|---------|---------------------|------------------|------------------------------|
| 1.      | Alpha                        | 148       | 813         | 100%        | 2e-39   | 90.41               | 55890            | EPI_ISL_6865096              |
| 2.      | Mu                           | 148       | 805         | 100%        | 2e-39   | 90.41               | 55884            | EPI_ISL_6811664              |
| 3.      | Beta                         | 148       | 805         | 100%        | 2e-39   | 90.41               | 55693            | EPI_ISL_6838995              |
| 4.      | Gamma                        | 148       | 802         | 99%         | 2e-39   | 90.41               | 56110            | EPI_ISL_6864534              |
| 5.      | Delta                        | 147       | 803         | 100%        | 4e-39   | 90.41               | 55947            | EPI_ISL_6864866              |
| 6.      | Wild type (WT)               | 145       | 793         | 100%        | 2e-38   | 89.04               | 56040            | NC_045512.2                  |
| 7.      | WT with D614G mutation (B.1) | 145       | 793         | 100%        | 2e-38   | 89.04               | 56235            | EPI_ISL_6832722              |
| 8.      | Lambda                       | 141       | 785         | 100%        | 3e-37   | 87.67               | 55954            | EPI_ISL_6694892              |

\*SARS-CoV-2/human/BEL/reg-20174/2021, complete genome, GenBank: OL672836.1, 29684 bp
